# Supplementary material
Source: MDPI journal article supplement (https://www.mdpi.com/2073-4441/14/20/3245)
Supplement: s1 [file s1]

# Effect of Attached Growth on Treatment Performance in Waste Stabilization Ponds

Yirui Lian, Liah X. Coggins, Jessica Hay, Andrew van de Ven and Anas Ghadouani \*

Department of Civil, Environmental and Mining Engineering, The University of Western Australia, 35 Stirling Highway, Crawley, WA 6009, Australia

\* Correspondence: anas.ghadouani@uwa.edu.au; Tel.: +61-8-6488-2687

## Tables

**Table S1.** List of equations.

| Description | Formula                                                                                                                                         | Reference                                            |
|-------------|-------------------------------------------------------------------------------------------------------------------------------------------------|------------------------------------------------------|
| (1)         | $e = \frac{V_{effective}}{V_{total}} = \frac{t_m}{t_n}$                                                                                         | Persson and Wittgren (2003)                          |
| (2)         | $C_e = \frac{4a_1 * e^{1-a_1/2d}}{(1+a_1)^2} * C_i$                                                                                             | Polprasert and Bhattarai (1985)                      |
| (3)         | $C_e = \frac{4a_1 * e^{1/2d}}{(1+a_1)^2 * e^{a_1/2d} - (1-a_1)^2 * e^{-a_1/2d}} * C_i$                                                          | Polprasert and Agarwalla (1994)                      |
| (4)         | $C_e = \frac{2a_1 e^{1/2d}}{(1+a_1) * e^{a_1/2d} - (1-a_1) * e^{-a_1/2d}} * C_i$                                                                | Muttamara and Puetpaiboon (1997)                     |
| (5)         | $d = 0.10201 \left( \frac{U_*}{u} \right)^{-0.81963} * \left( \frac{h}{L} \right) \left( \frac{h}{W} \right)^{-(0.98074 + \frac{1.38485h}{W})}$ | Polprasert and Agarwalla (1994)                      |
| (6)         | $d = \frac{0.184 * [tv * (W + 2h)]^{0.489} * W^{1.511}}{(L * h)^{1.489}}$                                                                       | Polprasert and Bhattarai (1985)                      |
| (7)         | $k = k_{fs} + a_s * \frac{\alpha\beta}{\alpha + \beta}$                                                                                         | Polprasert and Agarwalla (1994)                      |
| (8)         | $k_{fs} = k_{fss} * \left\{ 1 - \frac{0.083 \left[ \log \left( \frac{67.2}{L_0} \right) \right]}{k_{fss}} \right\}$                             | Thirumurthi (1974b), Polprasert and Agarwalla (1994) |
| (9)         | $a_s = \frac{2}{W} + \frac{1}{h} + \frac{2}{L}$                                                                                                 | Polprasert and Agarwalla (1994)                      |
| (10)        | $a_s = \frac{2}{W} + \frac{1}{h} + \frac{2}{L} + n * \left( \frac{2h_1 l_1}{WhL} \right)$                                                       | Polprasert and Agarwalla (1994)                      |

**Table S2.** Modelled effluent result (mg L<sup>-1</sup>) of equation (2), (3), and (4).

| Parameters   | Pond 1 | Pond 2 (baffle) |
|--------------|--------|-----------------|
| Observed     | 89     | 64              |
| Equation (2) | ~89.7  | ~65.5           |
| Equation (3) | ~89.2  | ~67.9           |
| Equation (4) | ~112.6 | ~92.9           |

## Notes

1. The modelled effluent results of equation (3) and (4) are shown in Table S2.
2. Equation (2) is simplified and suitable for estimating BOD reduction if dispersion number ( $d$ ) was less than 2.
3. Compared with equation (6), equation (5) has been validated with data of some full-scale ponds
4. Some of the parameters were obtained from other literature, of which  $d$  and  $k_{fa}$  are the most sensitive to the result, but the impact was within  $\pm 1.5\%$  when varied by  $\pm 10\%$ ; the effluent concentration will vary within  $\pm 1$  mg L<sup>-1</sup> depending on the precision of the values used in the calculation.
